# Supplementary material
Source: Research Square preprint supplement (doi:10.21203/rs.3.rs-10078868/v1)
Supplement: Supplementary file 1 [file bac8c66bfb8b80ddddc8c2f6.docx]

**QUESTIONNAIRE ON BULLYING**

SECTION A_SOCIODEMOGRAPHIC DATA

LGA……………………………………………………………

School ………………………………………………………..

Tick ✓ in the boxes provided

1. gender: (a) Male [ ] (b) Female [ ]

2.Age as at last birthday:……………..

3.class: (a) JSS1 [ ] (b) JSS2 [ ] (c)JSS3 [ ]

(d) SS1 [ ] (E) SS2 [ ] (F) SS3 [ ]

4. What kind of student are you?

a. Day [ ] b. Boarding [ ] C. Day and Boarding [ ]

5. Family setting. (a) Monogamous [ ] (b) polygamous [ ]

6. Religion: (a) Christianity..... (b)Muslim..... (C) Traditional...... (d) others.....

7. How many children are in your family ………………………..

8. Place of residence; a. Urban [ ]. b. Rural [ ]

9. Status of your parents; a. married [ ] b. co-habiting [ ] C. divorced [ ] d. separated [ ]

10. Who are you residing with; a. parents [ ] b. mother alone [ ] C. father alone [ ] d. guardian [ ] e. family member [ ].

11. Mothers educational level. a. None [ ], b. Primary completed [ ], c. secondary completed [ ], d. tertiary [ ]

12. Fathers educational level. a. None [ ]. b. Primary completed [ ], c. Secondary completed [ ]. d. tertiary [ ]

13. Mothers occupation: a. Civil servant [ ], b. Trader [ ], c. Artisan [ ], c. Farmer [ ], d. Unemployed [ ] e. Retired [ ]

14. Fathers occupation: a. Civil servant [ ] b. Trader [ ]. c. Artisan [ ]. d. Farmer [ ] e. Unemployed [ ] f. Retired [ ]

15. Do you smoke or inhale substances? A. Yes [ ], b. No [ ].

**SECTION B:** Prevalence of bullying

1. Have you heard of Bullying:

a. Yes [ ] b. No [ ] C. Not sure [ ]

2. Do you know what it means to be bullied? a. Yes [ ] b. No [ ] c. Not sure [ ]

3. Have you been bullied before? a. Yes [ ] b. No [ ] c. Not sure [ ]

4. If yes, How Often have you been bullied in School in the past 12 months.a. Never [ ]; b. Once [ ]; c. 2-5 times [ ]; d. more than 5 times [ ]

5. Have you bullied anyone? a. Yes [ ] b. No [ ] c. Not sure [ ]

6. If yes, How often Have you bullied Someone in the past 12 months. a. Never [ ]; b. Once [ ]; c. 2-5 times [ ]; d. more than 5 times [ ]

7. Class of student who bullied you: a) My class [ ], b) Different class but same grade (year) [ ], C) A higher grade(higher year) [ ], d) A lower grade(lower class) [ ],

8. Who have you been bullied by: A) Mainly by a girl [ ], B) By several girls [ ], C) Mainly by a boy [ ], D) By several boys [ ], E) both boys and girls [ ], F) a male Teacher [ ], G) A female Teacher [ ].

9. Where do you think bullying occurs the most? a. School bus [ ], b. Road to school [ ], c. Assemble group [ ], d. Rest room (toilet room) [ ], e. Lunch room [ ], f. Play ground [ ], g. Bushes around school [ ].

**SECTION C:** Types of bullying

In which ways have you been bullied or have you bullied someone in the past 12 months. (multiple answers allowed)

| S/N | Variable | Yes | No |
| --- | --- | --- | --- |
| 1. | Verbal abuse like calling abusive names, insulting someone |  |  |
| 2. | Physical assaults like lifting, pushing, grabbing, pinching, Beating, bruising, electric shocking, kicking, hitting, placing a harmful substance on the body, exposure to the elements, destroying property, physical obstruction of a student’s movement, collecting your money |  |  |
| 3. | Spreading rumors about someone, Leaving someone out of groups or events, Embarrassing someone in public, Preventing people from talking to someone |  |  |
| 4 | Have you been raped before in school |  |  |
| 5. | Insulting someone or being insulted through; Text message, Phone calls, Social media (whatsap, facebook, Instagram, tiktok, telegram etc) |  |  |

**SECTION D**: Consequences of bullying

Thick the appropriate answers:

| S/N |  | Yes | No |
| --- | --- | --- | --- |
| 1. | Have you failed your quiz or exam before as a result of bullying? |  |  |
| 2. | Have you been depressed as a result of students or teachers bullying you |  |  |
| 3. | Have you wished to drop out of school as a result of students or teachers bullying |  |  |
| 4. | Have you withdrawn from friends, avoided any social gatherings/events and food as a result of bullying |  |  |
| 5. | In this academic year, have you missed school because you felt unsafe to show up in school? |  |  |
| 6. | I think I'm not good enough |  |  |
| 7. | I feel inferior to other people |  |  |
| 8. | I feel useless and can't do anything right |  |  |
| 9. | Sometimes, I have thoughts of killing myself because of bullying |  |  |
| 10. | I never want to be noticed by anyone |  |  |
| 11. | I always like being on my own |  |  |
